# Supplementary material
Source: publisher figshare collection journal article supplement (https://frontiersin.figshare.com/ndownloader/files/13300556)
Supplement: Supplementary file [file 13300556]

## **Supplemental Information**

### **Effects of 5-Azacytidine on Growth and Hypocrellin Production of *Shiraia bambusicola***

Yan Jun Ma, Can Song Lu, Jian Wen Wang  
College of Pharmaceutical Sciences, Soochow University,  
Suzhou 215123, China

✉ Jian Wen Wang

[jwwang@suda.edu.cn](mailto:jwwang@suda.edu.cn); [bcjwwang@gmail.com](mailto:bcjwwang@gmail.com)

**TABLE S1|** The primers of the target genes and the internal reference gene used for qRT-PCR. F: forward primer, R: reverse primer.

| Unigene ID         | Gene description                                                         | Sequence                                                        |
|--------------------|--------------------------------------------------------------------------|-----------------------------------------------------------------|
| 18S                | Reference gene                                                           | F: 5'-ACGCAGCGAAATGCGATAAG-3'<br>R: 5'-CAAATTGTGCTGCGCTCCAA-3'  |
| Comp426_c1_seq1_2  | Velvet complex subunit LaeA                                              | F: 5'-CTATTACGCGCCAGTAGCCA-3'<br>R: 5'-TATCCGGTTGATCTGCGACG-3'  |
| Comp1521_c0_seq1_3 | Regulator Medusa                                                         | F: 5'-GGCGTTTGGGTCATTGCTTT-3'<br>R: 5'-GGCAAATGAAGGCTGTGCAA-3'  |
| Comp4435_c0_seq1_3 | Apses transcription factor StuA                                          | F: 5'-CCACCCGTCCTCTAGGTACA-3'<br>R: 5'-GAGGCAGGTGTTTTGCTGTG-3'  |
| CL744Contig2       | Developmental regulatory protein WetA                                    | F: 5'-CAAAAGCGCACAGTCGGAAA-3'<br>R: 5'-CCTGCCTTTTTGTGTCTGTGG-3' |
| CL1894Contig1      | C6 sexual development transcription factor-like protein NosA             | F: 5'-CAACAACGAGCAAAGGCGAA-3'<br>R: 5'-CCGTGGTTGGTGTAGTCGAA-3'  |
| CL3610Contig1      | GTP-binding protein EsdC                                                 | F: 5'-CAAAATGGCCGCTATCCAGC-3'<br>R: 5'-TAGCAACGGAGGCAGTTGAG-3'  |
| CL5806Contig1      | Sexual development activator VeA                                         | F: 5'-ATACGCCAGTCTCCACTCT-3'<br>R: 5'-AAACCTTGAGCAGCAAAGCG-3'   |
| CL13Contig3        | <i>Shiraia</i> sp. slf14 major facilitator superfamily (MFS) transporter | F: 5'-TCCATTGTTCCAGGCGTACC-3'<br>R: 5'-TATGCCTCGCCGTTCTTTGT-3'  |
| CL954Contig1       | <i>Shiraia</i> sp. slf14 polyketide synthase                             | F: 5'-GCTGTCCTGAAACGACTGGA-3'<br>R: 5'-CGAATATCGGGCACGTCTGA-3'  |
| CL1046Contig1      | <i>Shiraia</i> sp. slf14 hydroxylase                                     | F: 5'-GGACGATTCCACGCGATTTG-3'<br>R: 5'-CATGGCTGACCGCATCATTG-3'  |
| CL2000Contig1      | <i>Shiraia</i> sp. slf14 FAD/FMA-dependent oxidoreductase                | F: 5'-GATGGTTGCGTTGGCAAGTT-3'<br>R: 5'-GCTTCCCACCCATACGACAA-3'  |
| CL4891Contig1      | Multicopper oxidase                                                      | F: 5'-CCCATCAAACCATTTCGTCGC-3'<br>R: 5'-ATTTTGTGGCCGAGGTCCAT-3' |
| CL6402Contig1      | Zinc finger transcription factor 37                                      | F: 5'-TACGATGAGCGCCAACAAC-3'<br>R: 5'-CTGCATGGCTATCGGGGATT-3'   |
| CL6443Contig1      | <i>Shiraia</i> sp. slf14 O-methyltransferase                             | F: 5'-GCTGGTGGACCTCTCCTTTC-3'<br>R: 5'-AGCGTGCCTTCAGGTAGTTC-3'  |
| CL234Contig1       | Ferric reductase, NADH/NADPH oxidase and related proteins                | F: 5'-GAAGCGCTGACTGTGCAAAA-3'<br>R: 5'-GATGGATCTTGCGTTTCGCC-3'  |
| CL631Contig1       | NADPH oxidase A, NOX-A                                                   | F: 5'-CTGCTATACCGCCCTCACTG-3'<br>R: 5'-AGCGAACGAAGAAGAGCACA-3'  |
| CL4189Contig1      | Ferric reductase, NADH/NADPH oxidase and related proteins                | F: 5'-CAGGTACTCGGATCACGCTC-3'<br>R: 5'-GCCGTCAGTACCCAGTATCG-3'  |
| CL7214Contig1      | Ferric reductase, NADH/NADPH oxidase and related proteins                | F: 5'-CATGCACCAGAGTCATCCGT-3'<br>R: 5'-CTCACGAACTGCCCATACGA-3'  |

**TABLE S2|** Illumina RNA-Seq reads and *de novo* assembly statics of *S. bambusicola*.

| Attributes               | Control              |                      |                      | 5-AC                 |                      |                      |
|--------------------------|----------------------|----------------------|----------------------|----------------------|----------------------|----------------------|
|                          | Sample-1             | Sample-2             | Sample-3             | Sample-1             | Sample-2             | Sample-3             |
| Total clean reads        | 44955902             | 48342102             | 46551774             | 45032460             | 48475264             | 49017906             |
| Total mapped reads       | 44570791<br>(99.14%) | 47861314<br>(99.01%) | 46130507<br>(99.10%) | 44637772<br>(99.12%) | 47974891<br>(98.97%) | 48519993<br>(98.98%) |
| Total unigenes (≥300 bp) |                      |                      | 12293                |                      |                      |                      |
| Max length               |                      |                      | 22967                |                      |                      |                      |
| Min length               |                      |                      | 301                  |                      |                      |                      |
| Average length           |                      |                      | 2513.92              |                      |                      |                      |
| N50                      |                      |                      | 3662                 |                      |                      |                      |

**TABLE S3|** Summary statistics of unigenes annotation numbers.

| Annotation | Database |            |      |      |      |
|------------|----------|------------|------|------|------|
|            | NR       | Swiss-Prot | KOG  | KEGG | GO   |
| Numbers    | 10585    | 7776       | 6092 | 4099 | 7601 |

**TABLE S4|** Summary of DEGs in 5-AC treatment mycelium of *S. bambusicola*. The up/down-regulated DEGs were detected by comparing RNA-seq data of the unigenes of 5-AC treatment group to control group (up: ratio>1), down: ratio<1).

| Control         | Case               | Up-regulated | Down-regulated | Total DEGs |
|-----------------|--------------------|--------------|----------------|------------|
| Untreated group | 5-AC-treated group | 2392         | 1654           | 4046       |

Figure S1

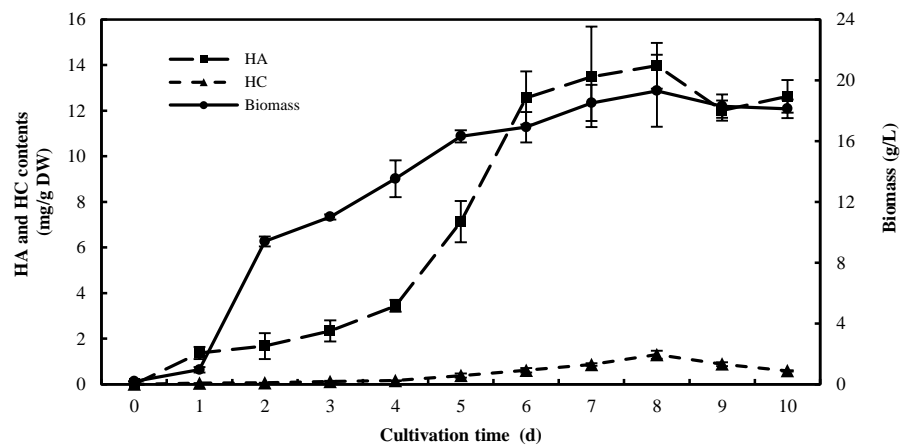

**FIGURE S1|** Time profiles of mycelia biomass and hypocrellin contents in submerged cultures of *S. bambusicola* S8. Values are mean  $\pm$  SD from three independent experiments.

Figure S2

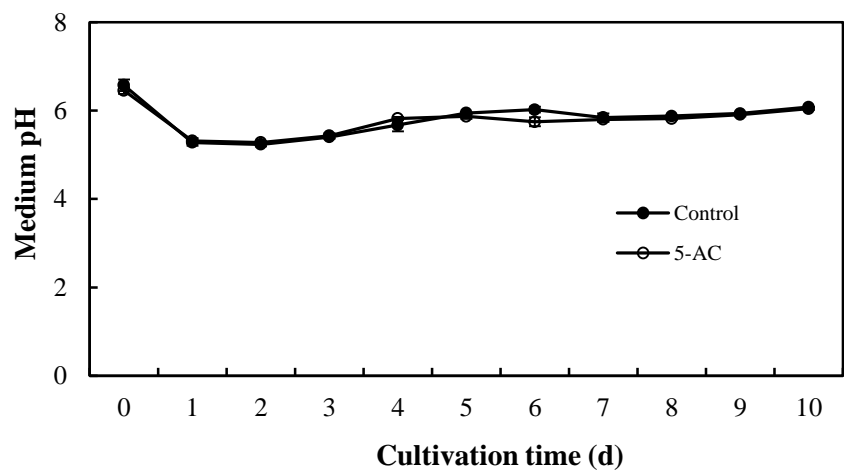

**FIGURE S2|** Effect of 5-AC on medium pH of *S. bambusicola* S8. 5-AC was added on day 3 of the culture. Values are mean  $\pm$  SD from three independent experiments.

Figure S3

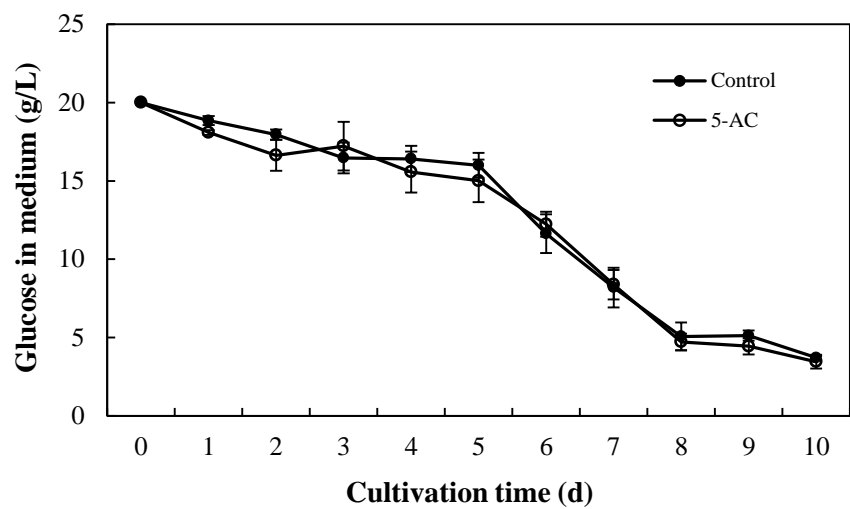

**FIGURE S3**| Effect of 5-AC on glucose consumption of *S. bambusicola* S8. 5-AC was added on day 3 of the culture. Values are mean  $\pm$  SD from three independent experiments.



Figure S4

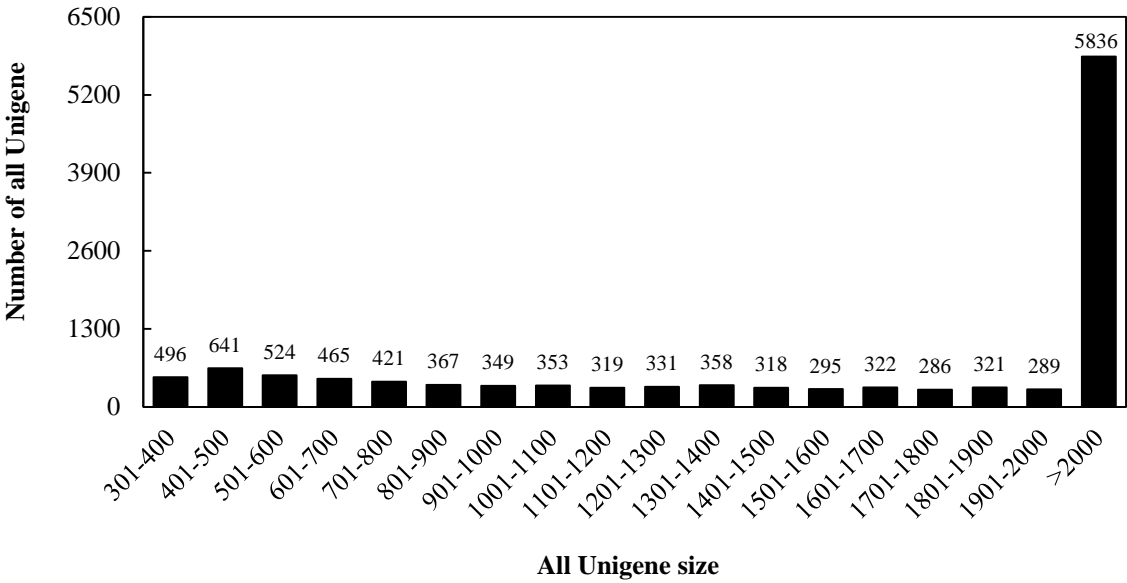

FIGURE S4| Length distributions of the unigenes.

Figure S5

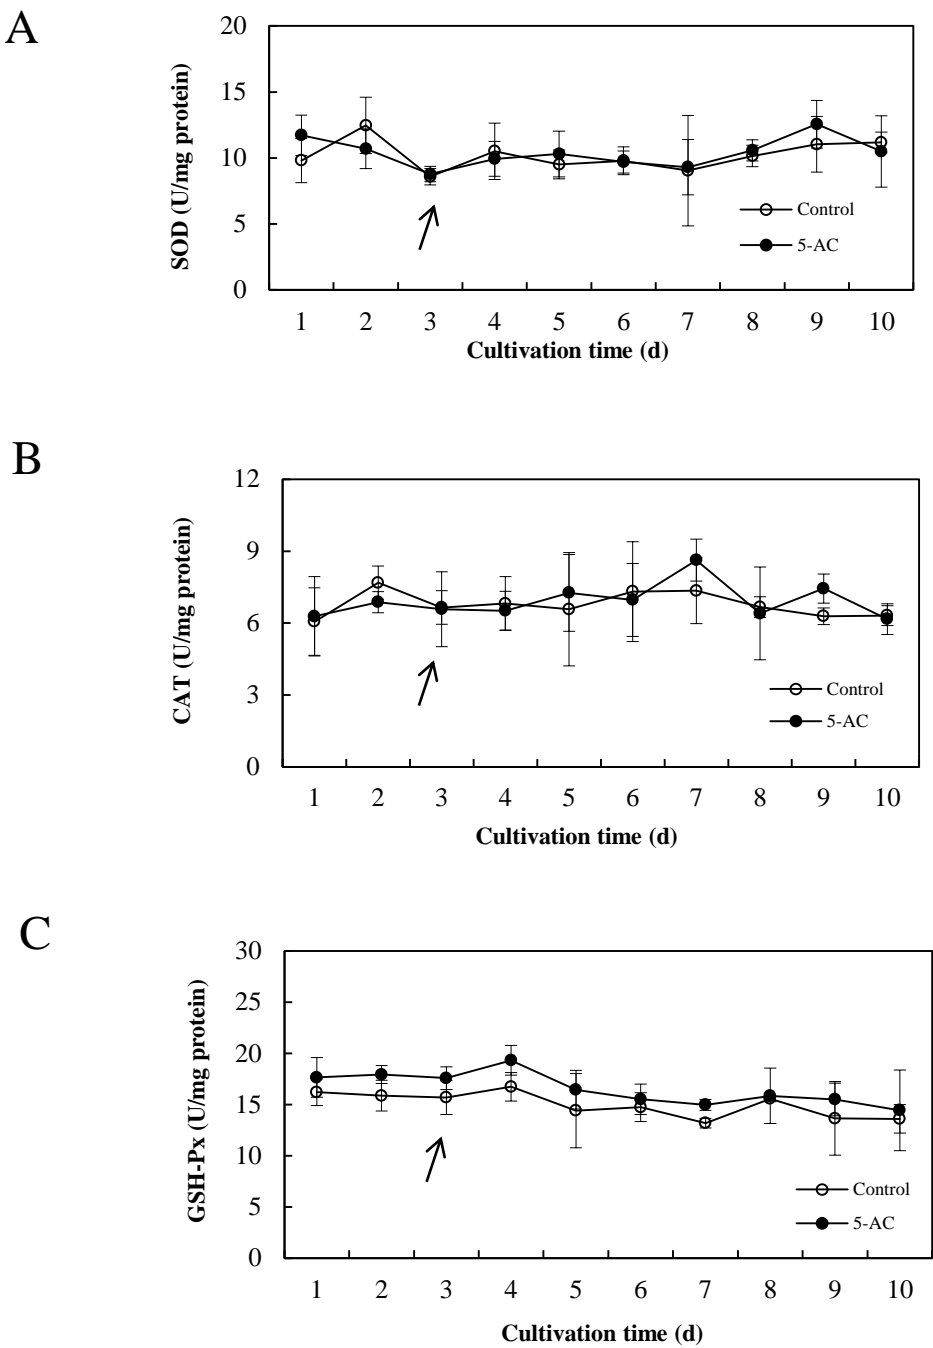

**FIGURE S5|** Effects of 5-AC on antioxidant enzyme activities of *S. bambusicola* S8. The superoxide dismutase (SOD) (**A**), catalase (CAT) (**B**), and glutathione peroxidase (GSH-Px) (**C**) activities of mycelia were detected under 5-AC treatment. 5-AC (0.8 mM) was added on day 3 of the culture. *Arrow* indicates the time point of 5-AC addition. Values are mean  $\pm$  SD from three independent experiments.

Figure S6

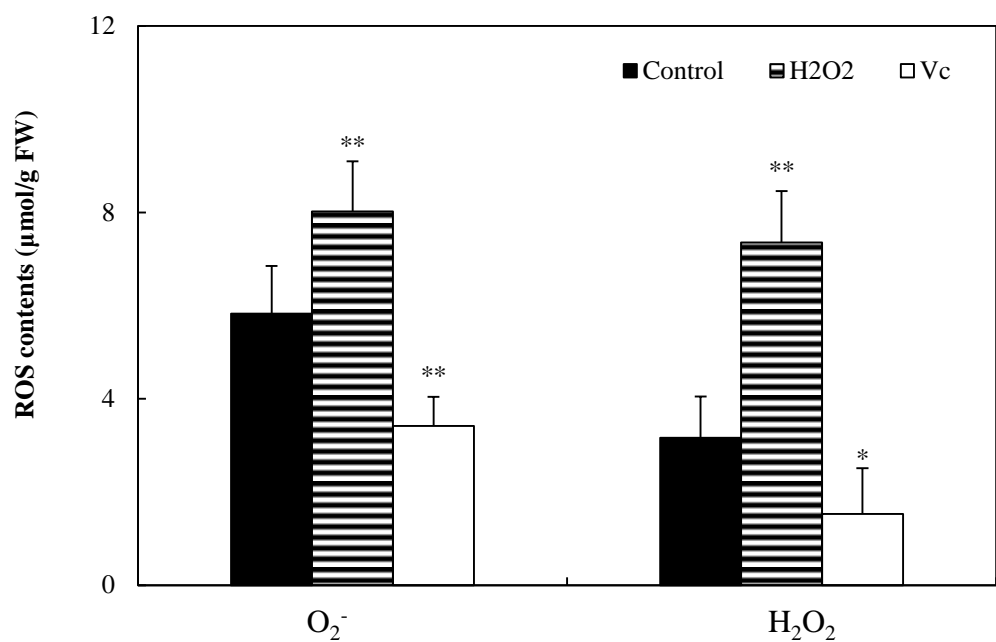

**FIGURE S6|** Effects of exogenous  $H_2O_2$  and Vc at 0.01 mM on ROS ( $O_2^-$  and  $H_2O_2$ ) contents in *S. bambusicola* S8 mycelium.  $H_2O_2$  or Vc was added on day 3 of the culture. After 1 day of treatment the mycelia were harvested and measured. Values are mean  $\pm$  SD from three independent experiments. \* $p < 0.05$ , \*\* $p < 0.01$  versus control.
